# Supplementary material
Source: publisher figshare collection journal article supplement (https://acs.figshare.com/ndownloader/files/3967882)
Supplement: Supplementary file 1 [file 3967882]

## Supporting Information

### **Sensitive chemiluminescence immunoassay for *E. coli* O157:H7 detection with signal dual–amplification using glucose oxidase and laccase**

**Yun Zhang,<sup>†,‡,§</sup> Chen Tan,<sup>†,§</sup> Ruihua Fei,<sup>†,‡</sup> Xiaoxiao Liu,<sup>†,‡</sup> Yuan Zhou,<sup>†,‡</sup> Jing Chen,<sup>†</sup> Huanchun Chen,<sup>†</sup> Rui Zhou,<sup>†</sup> Yonggang Hu<sup>\* †,‡</sup>**

<sup>†</sup> *State Key Laboratory of Agricultural Microbiology, Huazhong Agricultural University, Wuhan 430070, China*

<sup>‡</sup> *College of Life Science and Technology, Huazhong Agricultural University, Wuhan 430070, China*

## Optimization of Immunoassay Conditions

Laccase significantly enhanced the CL signal of a luminol–H<sub>2</sub>O<sub>2</sub> system in a highly basic medium. This enhancement may be due to the fact that the basic pH is beneficial to the decomposition pattern of the key intermediate alpha-hydroxy-hydroperoxide to ground-state phthalate and facilitates high chemiluminescence signals. This decomposition reaction was unique, depended only on pH of the system<sup>1</sup>, was presumed to be the rate-determining step of luminol CL.<sup>2</sup> The effect of pH on the variance in CL ratio of  $I/I_0$  (where  $I$  and  $I_0$  are the CL signals with and without *E. coli* O157:H7, respectively) was investigated by varying the pH from 10.3 to 12.6. Figure S1A shows a significant increase in  $I/I_0$  increased at pH 11.0 but a decrease with further increased pH. The pH dependence of light emission may be due to the effect of enzyme inactivation at pH > 11.0. After H<sub>2</sub>O<sub>2</sub> formation, the pH of the luminol–supernatant–laccase mixture was adjusted to 11.0 using 0.1 mol L<sup>-1</sup> NaOH solution before CL detection.

The effect of luminol on  $I/I_0$  was investigated at concentrations between  $1.0 \times 10^{-6}$  mol L<sup>-1</sup> and  $5.0 \times 10^{-4}$  mol L<sup>-1</sup>. Both signal and background increased with increased luminol concentration. The highest  $I/I_0$  was obtained at  $1.0 \times 10^{-5}$  mol L<sup>-1</sup> (Figure S1B). As shown in Figure S1C, the effect of laccase concentration on  $I/I_0$  was determined, with  $I/I_0$  rapidly increased with increased laccase concentration, peaking at 0.5 mg mL<sup>-1</sup>. Further addition of laccase resulted in decreased  $I/I_0$  because of the high background signal occurring under these conditions. Thus,  $1.0 \times 10^{-5}$  mol L<sup>-1</sup> luminol and 0.5 mg mL<sup>-1</sup> laccase were chosen for subsequent experiments.

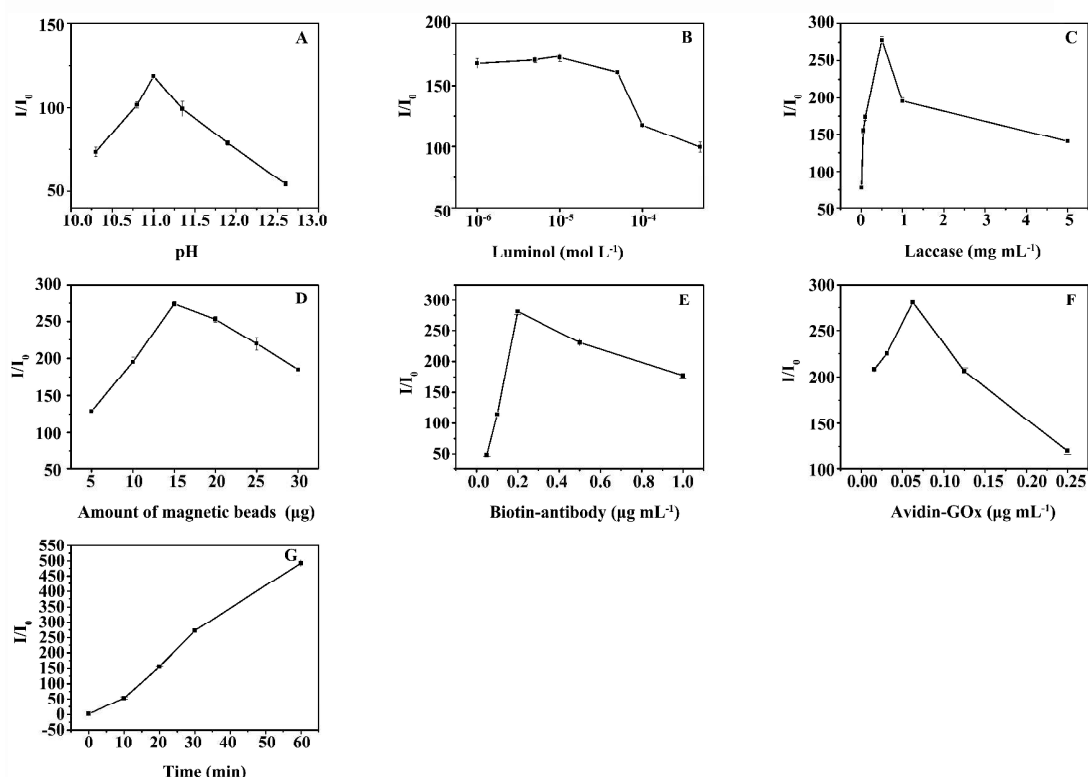

**Figure S1.** Effects of various conditions on the variance in CL value ratio of  $I/I_0$ , where  $I$  and  $I_0$  are CL signals with and without *E. coli* O157:H7, respectively. (A) Effect of pH. Conditions:  $1.72 \times 10^5$  CFU mL<sup>-1</sup> *E. coli* O157:H7; 0.01 mol L<sup>-1</sup> glucose; 15.0 µg of IMBs;  $1.0 \times 10^{-4}$  mol L<sup>-1</sup> luminol; 0.1 mg mL<sup>-1</sup> laccase; 0.20 µg mL<sup>-1</sup> biotin-antibody; 0.06 µg mL<sup>-1</sup> avidin-GOx; and 30 min catalytic time. (B) Effect of luminol concentration. Conditions: pH 11.0; other conditions were the same as in Fig. S1A. (C) Effect of laccase concentration. Conditions:  $1.0 \times 10^{-5}$  mol L<sup>-1</sup> luminol; pH 11.0; other conditions were the same as in Fig. S1A. (D) Effect of IMB amount. Conditions: pH 11.0;  $1.0 \times 10^{-5}$  mol L<sup>-1</sup> luminol; 0.5 mg mL<sup>-1</sup> laccase; other conditions were the same as in Fig. S1A. (E) Effect of biotin-antibody concentration. Conditions: pH 11.0;  $1.0 \times 10^{-5}$  mol L<sup>-1</sup> luminol; 0.5 mg mL<sup>-1</sup> laccase; other conditions were the same as in Fig. S1A. (F) Effect of avidin-GOx concentration. Conditions: pH 11.0;  $1.0 \times 10^{-5}$  mol L<sup>-1</sup> luminol; 0.5 mg mL<sup>-1</sup> laccase; 0.20 µg mL<sup>-1</sup> biotin-antibody; other conditions were the same as in Fig. S1A. (H) Effect of catalytic time. Conditions: pH 11.0;  $1.0 \times 10^{-5}$  mol L<sup>-1</sup> luminol; 0.5 mg mL<sup>-1</sup> laccase; 0.20 µg mL<sup>-1</sup> biotin-antibody; 0.06 µg mL<sup>-1</sup> avidin-GOx; other conditions were the same as in Fig. S1A. Error bars indicate the standard deviations from five independent measurements.

The effect of IMB amount (from 5.0 to 30.0 µg) on  $I/I_0$  was also investigated

(Figure S1D).  $I$  significantly increased and reached a plateau at an amount of 15.0 µg

of IMBs. Further addition of IMBs did not enhance  $I$ , whereas  $I_0$  continually increased under this condition. This phenomenon was probably due to the excess IMBs that induce a slightly non-specific background. As a result,  $I/I_0$  reached its maximum after the addition of 15.0  $\mu\text{g}$  of IMBs and then decreased. Thus, 15.0  $\mu\text{g}$  of IMBs was added in subsequent experiments.

The effects of the concentrations of biotin-conjugated monoclonal anti-O157 antibody (biotin-antibody) and avidin-conjugated GOx (avidin-GOx) were examined and optimized. First,  $I/I_0$  was observed to increase within the range of 0.05  $\mu\text{g mL}^{-1}$  to 0.20  $\mu\text{g mL}^{-1}$  biotin-antibody and then significantly decrease. Thus, 0.20  $\mu\text{g mL}^{-1}$  of biotin-antibody was selected for subsequent experiments (Figure S1E). Second, the CL and the background signal were increased with the increasing of the avidin-GOx concentration (Figure S1F). The highest  $I/I_0$  was obtained using 0.06  $\mu\text{g mL}^{-1}$  and then decreased. Several GOx samples without avidin coupling and one sample of avidin-GOx conjugates were respectively incubated with the Anti-O157:H7 IMBs to investigate the role of the GOx and avidin-GOx conjugates for nonspontaneously adsorb onto the beads. After magnetic separation, 100  $\mu\text{L}$  of 0.02  $\text{mol L}^{-1}$  glucose in PBS solution (pH 7.4) was then added, and the mixture was incubated with shaking at 37  $^{\circ}\text{C}$  for 30 min. Finally, 100  $\mu\text{L}$  supernatant was mixed with 50.0  $\mu\text{L}$  of laccase and 50.0  $\mu\text{L}$  of luminol, and the CL signals were measured using a multifunctional microplate reader. These CL signals were compared with that of negative control. As shown in Figure S2, the CL signals of samples containing GOx became similar to that of the negative control with increased GOx concentration from 0.01  $\mu\text{g mL}^{-1}$  to 0.50

$\mu\text{g mL}^{-1}$ . However, the CL signal of the sample containing avidin–GOx conjugates was higher than that of the negative control. This finding indicated the avidin–GOx conjugates can cause slightly nonspecific binding because conjugated avidin can nonspecifically bind to certain biological components.<sup>3-5</sup> As a result,  $I_0$  continually increased when the concentration of avidin–GOx conjugates higher than  $0.06 \mu\text{g mL}^{-1}$ , and leading to the decrease of  $I/I_0$ . Accordingly,  $0.06 \mu\text{g mL}^{-1}$  of avidin–GOx conjugates was then used in further experiments.

Excess of glucose ( $0.01 \text{ mol L}^{-1}$ ) was used for subsequent experiments. The influence of the catalytic time on  $I/I_0$  was also studied. Figure S1G shows that  $I/I_0$  increased at 60 min, which was due to the assumption that the amount of  $\text{H}_2\text{O}_2$  increased with prolonged catalytic time. Based on this finding and for the sake of rapid analysis, a catalytic time of 30 min was selected for subsequent experiments.

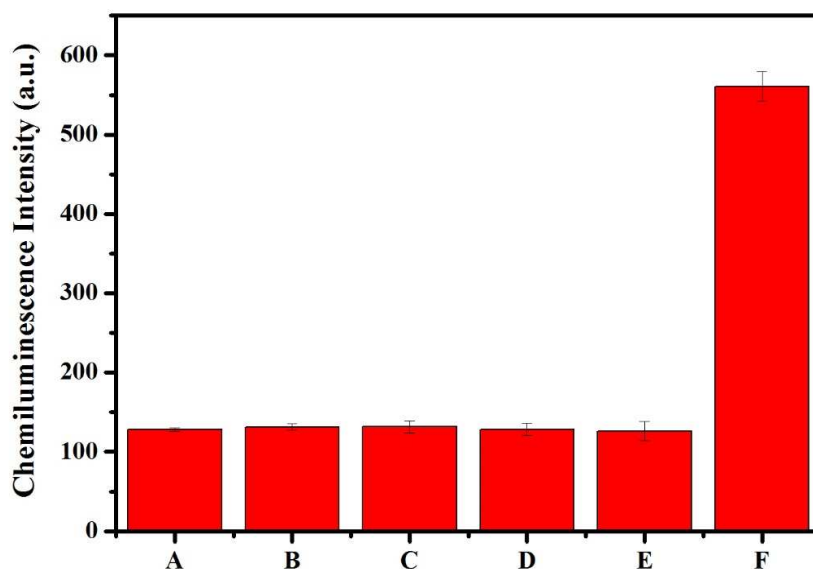

Figure S2. Effect of GOx and avidin–GOx conjugates for nonspontaneously adsorb onto the beads: (A) negative control (without added GOx or avidin–GOx conjugates),

(B)  $0.01\mu\text{g mL}^{-1}$  GOx, (C)  $0.05\mu\text{g mL}^{-1}$  GOx, (D)  $0.1\mu\text{g mL}^{-1}$  GOx, (E)  $0.5\mu\text{g mL}^{-1}$  GOx, and (F)  $0.0625\mu\text{g mL}^{-1}$  of a avidin–GOx conjugates.

## REFERENCES

- (1) Merényi, G.; Lind, J.; Eriksen, T. E. *J. Biolumin. Chemilumin.* **1990**, 5, 53–56.
- (2) Burdo, T. G.; Seitz, W. R. *Anal. Chem.* **1975**, 47, 1639 -1643.
- (3) Fishleder, A.; Sedmak, D.; Tubbs, R. R. *Amer. J. Clin. Pathol.* **1982**, 77, 770–772.
- (4) Bussolati, G.; Guglitotta, P. *J. Histochem. Cytochem.* **1983**, 31, 1419–1421..
- (5) Jones, C. J. P.; Mosley, S. M.; Jeffery, I. J. M.; Stoddart, R. W. *Histochem. J.* **1987**, 19, 264–268.
